# Supplementary material
Source: publisher figshare collection journal article supplement (https://acs.figshare.com/ndownloader/files/4674628)
Supplement: Supplementary file 1 [file 4674628]

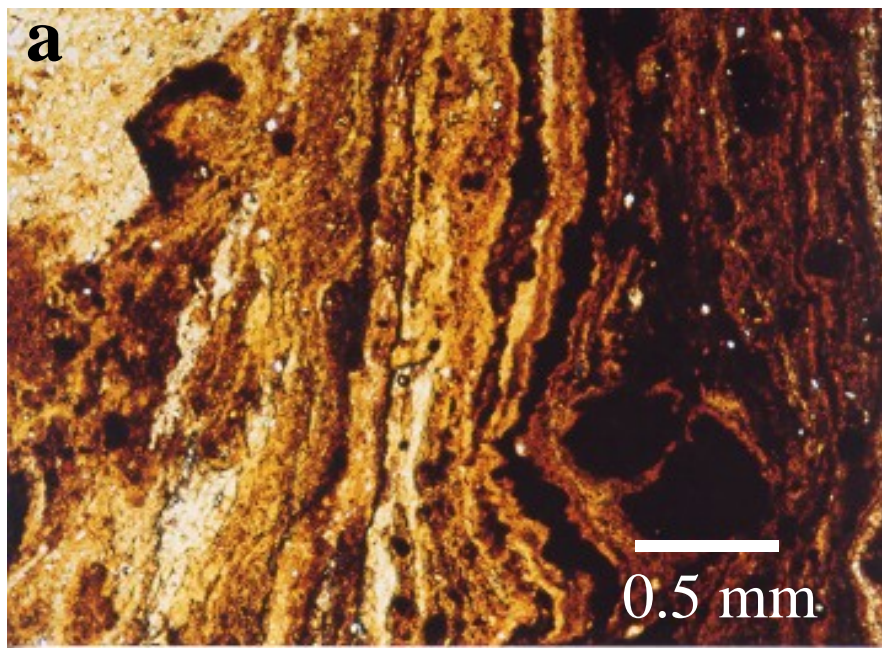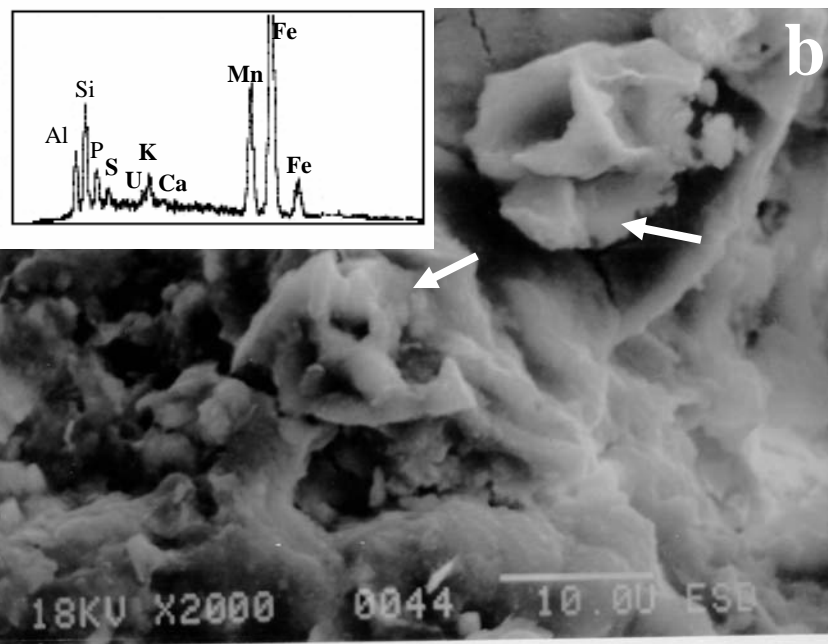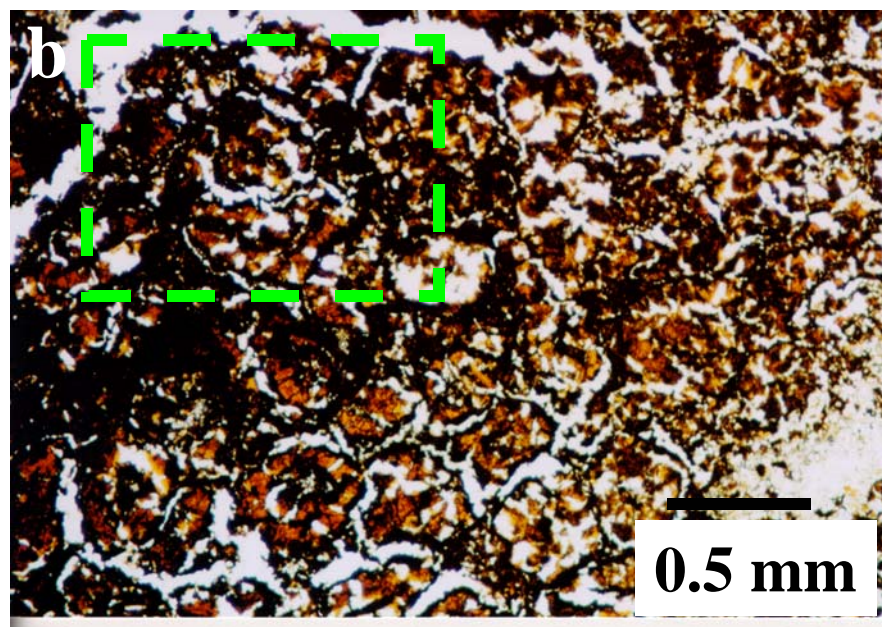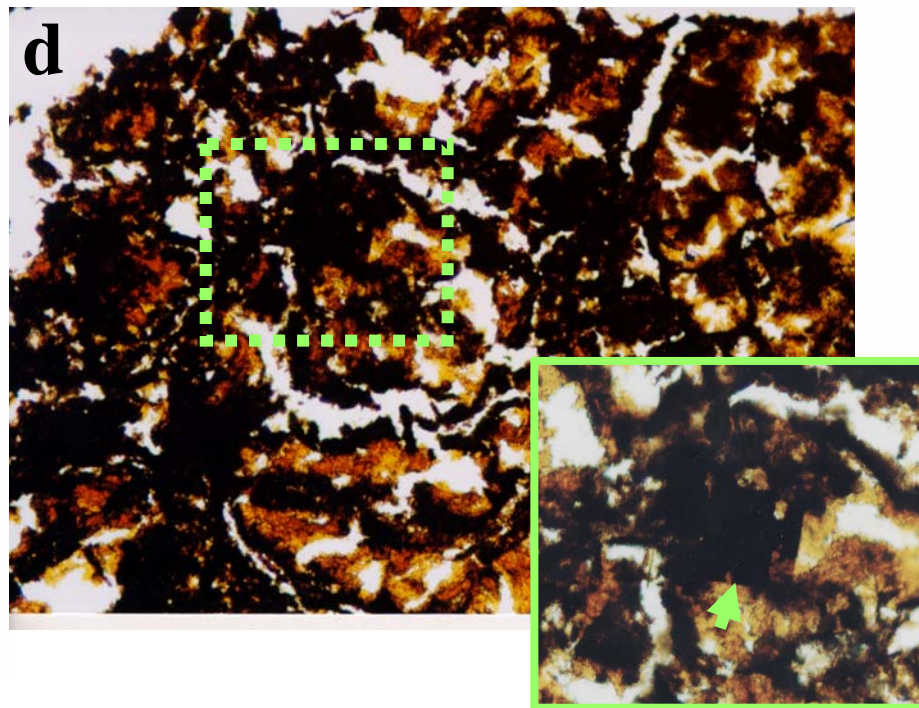

# Core 103

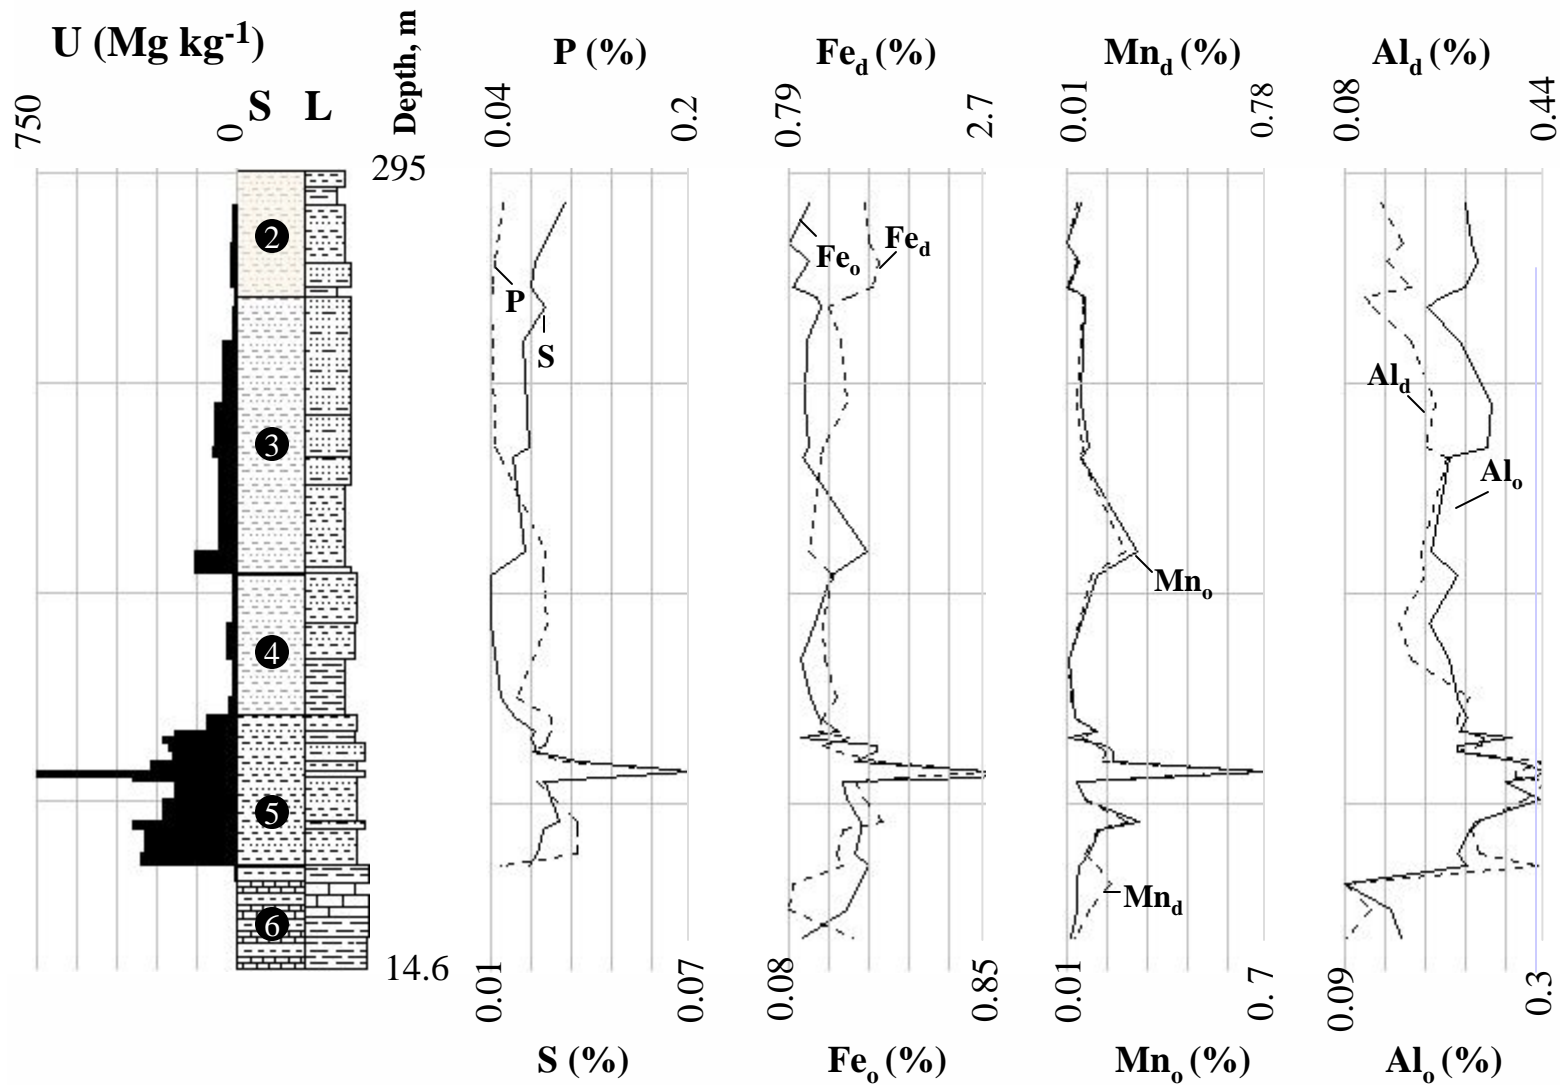

## Lithology

- Interbedded shale> sandstone
- Interbedded sandstone> shale
- Interbedded limestone> shale
- Shale
- Sandstone

## Stratigraphy

- Zone 2- oxidized and highly weathered interbedded shale and sandstone.
- Zone 3- partially oxidized and highly weathered interbedded shale and sandstone.
- Zone 4- unoxidized weathered interbedded shale and sandstone
- Zone 5- reduced interbedded calcareous shale and sandstone
- Zone 6- interbedded limestone, shale and sandstone bedrock



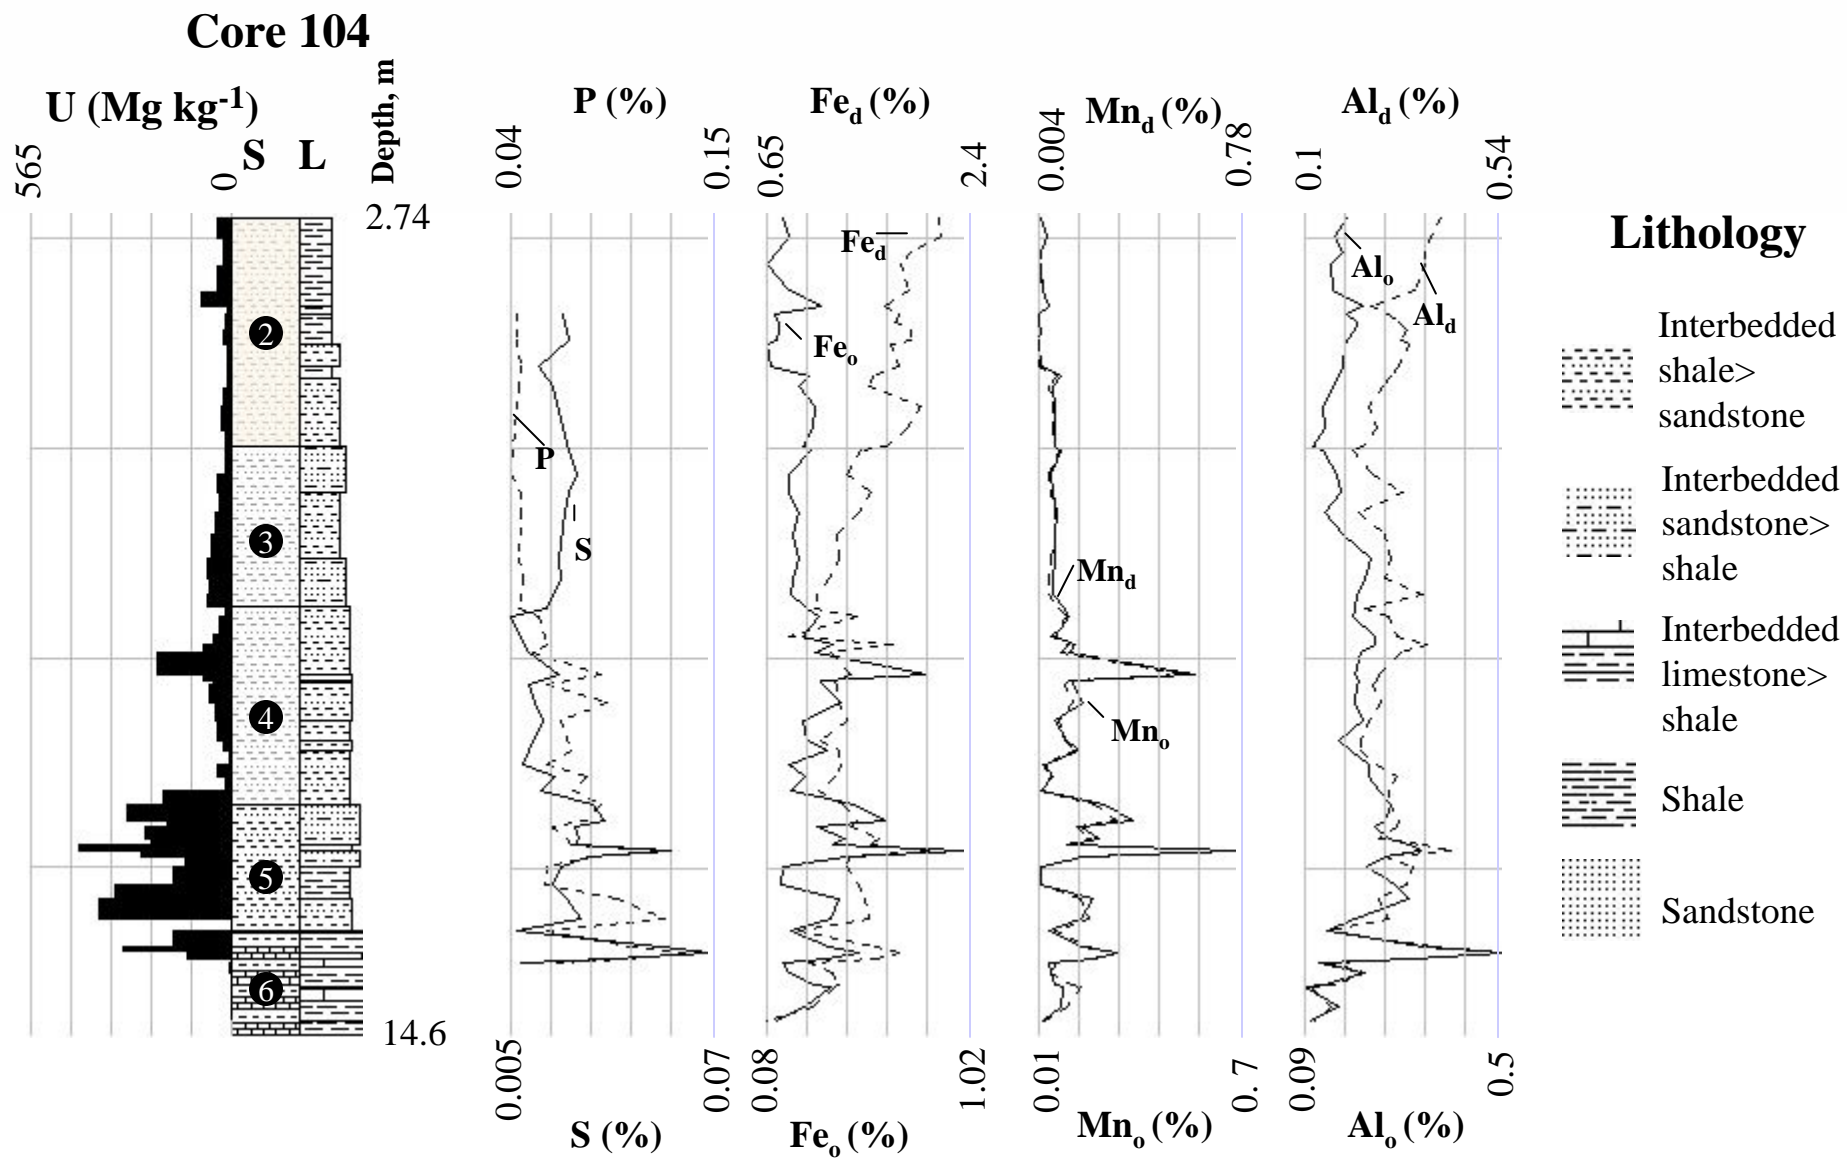

### Stratigraphy

Zone 2- oxidized and highly weathered interbedded shale and sandstone.

Zone 3- partially oxidized and highly weathered interbedded shale and sandstone.

Zone 4- unoxidized weathered interbedded shale and sandstone

Zone 5- reduced interbedded calcareous shale and sandstone

Zone 6- interbedded limestone, shale and sandstone bedrock

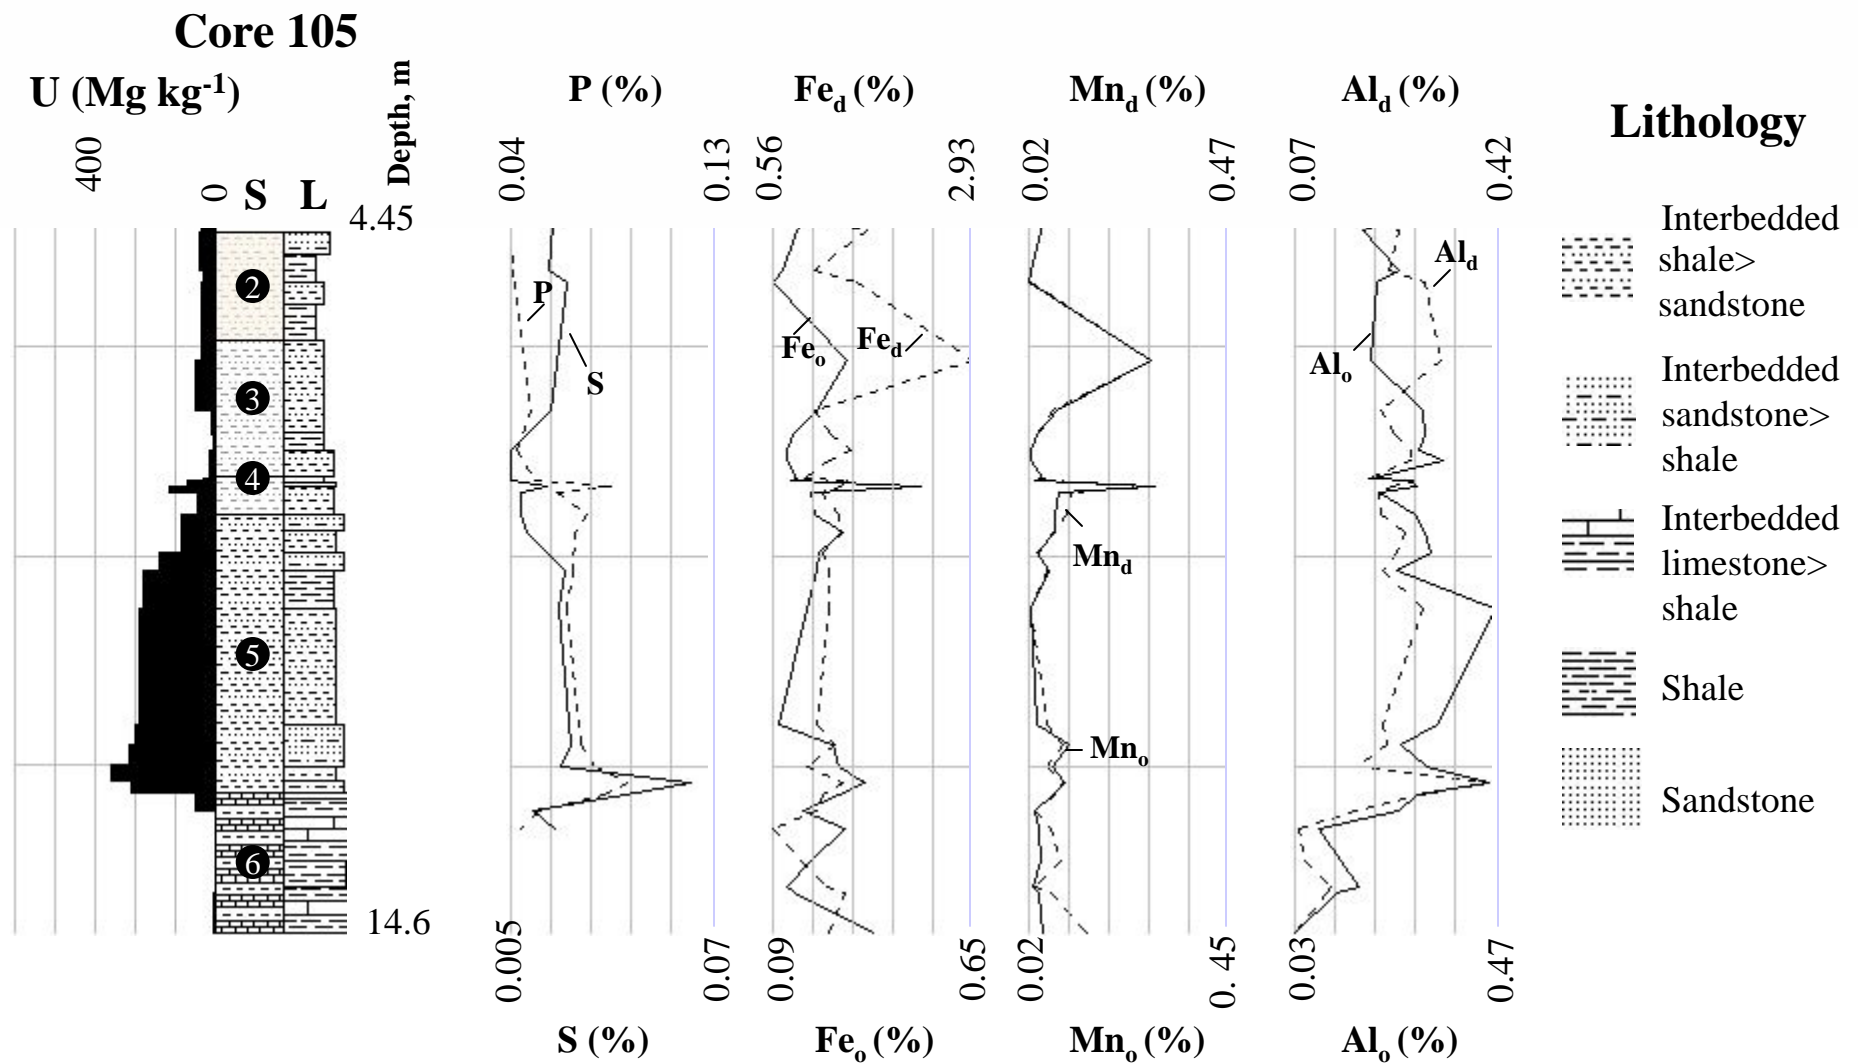

## Stratigraphy

Zone 2- oxidized and highly weathered interbedded shale and sandstone.

Zone 3- partially oxidized and highly weathered interbedded shale and sandstone.

Zone 4- unoxidized weathered interbedded shale and sandstone

Zone 5- reduced interbedded calcareous shale and sandstone

Zone 6- interbedded limestone, shale and sandstone bedrock
